1 nzffdr: an R package to import, clean and update data from the New Zealand Freshwater

2 Fish Database

3

4 Finnbar Lee<sup>a\*</sup> (ORCID: <https://orcid.org/0000-0002-9219-1486>)

5 Nick Young<sup>b</sup> (ORCID: <https://orcid.org/0000-0002-5261-4042>)

6

7 <sup>a</sup>School of Environment, University of Auckland, Auckland, New Zealand; <sup>b</sup>Centre for

8 eResearch, University of Auckland, Auckland, New Zealand

9 \*corresponding author: [finnbar.lee@auckland.ac.nz](mailto:finnbar.lee@auckland.ac.nz)

10

11

12

13

14

15

16

17

18

19

20

21

22

23 nzffdr: an R package to import, clean and update data from the New Zealand Freshwater  
24 Fish Database

## 25 **Abstract**

26 The New Zealand Freshwater Fish Database (NZFFD) is a repository of more than  
27 155,000 records of freshwater fish observations from around New Zealand, maintained  
28 by the National Institute of Water and Atmospheric Research (NIWA). Records from  
29 the NZFFD can be downloaded using a web interface. The statistical computing  
30 language R is now widely used for data wrangling, analysis, and visualisation. Here, we  
31 present nzffdr, an open source R software package that: i) allows users to query and  
32 download data from the New Zealand Freshwater Fish Database directly in R, ii)  
33 provides functions to clean imported data, iii) facilitates the addition of information  
34 such as species names and Department of Conservation threat classification status, and  
35 iv) a workflow for visualising information from the NZFFD. The nzffdr package aims  
36 to standardise, simplify, and speed up a workflow likely already used in an *ad hoc*  
37 manner by scientists across New Zealand and abroad.

38

39 **Keywords:** software; open source; NZFFD, New Zealand, freshwater fish,  
40 reproducible workflow

41

42

43

## 44 **Introduction**

45 The New Zealand Freshwater Fish Database (NZFFD) contains over 155,000  
46 observations of freshwater fish (plus freshwater shrimp and kōura) from across New  
47 Zealand dating back to 1901 (Crow, 2017). The observations typically include  
48 information on sampling location, date, time, fishing method, and the organisation that  
49 conducted the survey; less frequently information on the number and size of individuals  
50 caught is included. The database is a remarkable asset and is widely used to inform  
51 academic and governmental research and decision making (Goodman et al., 2014; Joy  
52 & Death, 2004). A limitation of the NZFFD is that it lacks some basic variables that  
53 individuals need to add each time they analyse NZFFD data; for example, species'  
54 common and scientific names are not included (a 6 letter species code is included), nor  
55 is any other taxonomic information (e.g. family), threat classification status, and  
56 whether the species is native or introduced. Adding this information each time data are  
57 downloaded is not trivial and can be time consuming if many records are downloaded.

58 The statistical computing language R (R Core Team, 2020) has increased in  
59 popularity over the last decade, and is now one of the most common programming  
60 languages used by ecologists (Lai et al., 2019). R is typically used for data wrangling,  
61 analysis, and visualisation and is a popular tool for interrogating NZFFD data (Jellyman  
62 & Harding, 2012; Jones & Closs, 2015; Leathwick et al., 2006).

63 Here we present the `nzffdr` R package. We describe the features of each of the  
64 core functions in the `nzffdr` package and then illustrate how the functions can be used  
65 via an analysis of NZFFD data.

## 66 **Methodology**

67 The `nzffdr` package has four core functions and four core datasets. The four core  
68 functions: i) import NZFFD data from in R. ii) clean up a variety of spelling

69 inconsistencies and add a new variable "form" which describes the sampling habitat e.g.  
70 (river, stream, wetland etc.), iii) add missing information such as, family, genus and  
71 species names, common names, Department of Conservation threat classification status  
72 (Dunn et al., 2017) and whether the species is native or introduced and, iv) import and  
73 attaches associated REC data. The four built-in datasets are: i) a subset of 200 rows  
74 from the NZFFD that can be accessed without an internet connection and used for  
75 exploratory analysis, ii) the different fishing methods included in the NZFFD; it is  
76 possible to search the database using these terms so they are provided for reference, iii)  
77 scientific and common names of all species included in the NZFFD; the database can be  
78 searched by species name (using scientific or common names) so these are provided for  
79 reference, iv) a simplified version of the 1:150k NZ map outline available from Land  
80 Information New Zealand ([https://data.linz.govt.nz/layer/50258-nz-coastlines-topo-](https://data.linz.govt.nz/layer/50258-nz-coastlines-topo-150k/)  
81 150k/) to facilitate easy mapping of species' distributions.

## 82 ***Importing data: nzffdr\_import()***

83 The `nzffdr_import()` function is used to search the NZFFD and takes input  
84 arguments that align with the search options of the NZFFD web user-interface. There  
85 are seven search arguments:

86 (1) `catchment`: this refers to the Catchment number, a 6-digit number unique to the  
87 reach of interest. Search using the individual reach number (e.g. `catchment =`  
88 `"702.500"`), or for all rivers in a catchment you can use the wildcard search term (e.g.  
89 `catchment = "702%"`).

90 (2) `river`: search for a river by name; for example, to get all records for the Clutha  
91 (`river = "Clutha"`).

92 (3) *Location*: search for river by sampling locality for example, to get all records  
93 from Awakino (`location = "Awakino"`).

94 (4) *fish\_method*: search by fishing method used, for example to get all records  
95 where fish were caught using a seine net (`fish_method = "Other net - Seine"`). There  
96 are currently 59 different possible options for fishing method, a list of all possible  
97 fishing method is available via the function `nzffd_method()`.

98 (5) *species*: search for a particular species. There are currently 75 unique species in  
99 the NZFFD, a list of all possible species is available via the function  
100 `nzffd_species()`. Searches can be made using either common or scientific names  
101 and it is possible to search for multiple species at once. e.g. to search for Black mudfish  
102 use `species = "Black mudfish"` or `species = "Neochanna diversus"` and to search  
103 for Black mudfish and Bluegill bully use `species = c("Black mudfish", "Bluegill  
104 bully")`.

105 (6) *starts*: starting search date.  
106 (7) *ends*: ending search date.

107 Not specifying the arguments will return all possible records. The  
108 `nzffdr_import()` function requires an internet connection to query NIWA's  
109 database.

#### 110 ***Cleaning imported data: nzffd\_clean()***

111 While the data imported from NZFFD is generally does not have many errors there are  
112 some small inconsistencies (e.g. spelling of river and place names); the  
113 `nzffd_clean()` function aims to fix these errors. The first letter of all words in the  
114 columns "catchname" and "locality" are capitalised, and any non-alphanumeric  
115 characters are removed. Observations in the "time" column are converted to a

116 standardised 24-hour format and nonsensical values (e.g. "0.677") converted to "NA".  
117 The organisation column ("org") is converted to all lowercase and has non-  
118 alphanumeric characters removed. The NZMS260 map code ("map") is converted to  
119 lower case and has any non-three-digit codes converted to "NA". Observations in the  
120 catchment name column ("catchname") are standardised, e.g. "Clutha River", "Clutha  
121 r" and "Clutha river" all become "Clutha R". Finally, a new variable "form" is added,  
122 which defines each observation as one of the following: creek, river, tributary, stream,  
123 lake, lagoon, pond, burn, race, dam, estuary, swamp, drain, canal, tarn, wetland,  
124 reservoir, brook, spring, gully or NA. The "form" variable is created by matching the  
125 above "forms" with the "locality" column; therefore, it reflects the description given by  
126 the "locality" variable.

### 127 ***Filling in missing data: nzffd\_fill()***

128 Additional useful information can easily be added to the NZFFD dataset. The  
129 `nzffd_fill()` function adds columns giving the species' common name  
130 ("common\_name"), scientific name (genus + species, "sci\_name"), "family", "genus",  
131 "species", the Department of Conservation threat classification status ("threat\_class",  
132 [Dunn et al., 2017]) and whether the species is native or introduced ("native").  
133 Additionally, if the "map" and "altitude" variables have some "NA" values;  
134 `nzffd_fill()` can fill most of these by extracting the relevant data from The  
135 NZMS260 map tiles (<https://data.linz.govt.nz/layer/51579-nzms-260-map-sheets>) and  
136 an 8m digital elevation model ([https://data.linz.govt.nz/layer/51768-nz-8m-digital-](https://data.linz.govt.nz/layer/51768-nz-8m-digital-elevation-model-2012)  
137 [elevation-model-2012](https://data.linz.govt.nz/layer/51768-nz-8m-digital-elevation-model-2012)) raster, respectively. This function requires an internet  
138 connection to query the 8m DEM.

139 ***Adding River Environment Classification data: nzffd\_add()***

140 Finally, network topology and environmental information from the River Environment  
141 Classification (REC) database (Snelder & Biggs, 2004) can be added to the NZFFD  
142 data using `nzffd_add()`. This function takes the NZFFD “nzreach” variable and  
143 matches it against the corresponding “NZREACH” variable in the REC database, and  
144 imports all the associated REC data, adding 24 new columns to the NZFFD dataset.  
145 This function requires an internet connection to query the REC database.

146 ***Illustration of nzffdr functionality***

147 To demonstrate the utility of the `nzffdr` package we imported the entire NZFFD into R,  
148 cleaned up the imported data, filled in missing data, and added the REC database. We  
149 then highlight the usefulness of some of the new variables that `nzffdr` has added to the  
150 NZFFD dataset. Specifically, we map the distribution of native and introduced species,  
151 plot the relative proportion of records across habitat forms for each of the *Galaxias*  
152 species, highlighting their respective conservation status, and finally use the REC data  
153 to show the distance inland that each of the *Galaxias* species has been found.

154 All analysis was carried out using R v 4.1.0 (R Core Team, 2020). The package  
155 `dplyr` v 1.0.6 (Wickham et al., 2021) was used for data wrangling, `ggplot2` v 3.3.3  
156 (Wickham, 2016) for visualisation, and `nzffdr` v 1.0.0 (Lee & Young, 2021) used to  
157 access and tidy the NZFFD data. The code used to generate the results presented here is  
158 available via Figshare (<https://doi.org/10.17608/k6.auckland.14776770.v1>).

159

160 **Results and discussion**

161 We plotted the distribution of introduced and native species records from the NZFFD  
162 (Fig. 1), where the introduced/native variable and the map of New Zealand are provided

163 by the `nzffdr` R package. We then graphed the relative number of records occurring  
164 across 10 habitat forms for each of the *Galaxias* species, including information about  
165 each species' threat classification status (Fig. 2). Habitat form, threat classification, and  
166 species common names have all been added to NZFFD data via the `nzffdr` package.  
167 Finally, distance to sea (km) at each of the locations of *Galaxias* species in the NZFFD  
168 have been observed at was plotted (Fig. 3). The distance to sea variable is added to the  
169 NZFFD data from the River Environment Classification database via the `nzffdr`  
170 package. This analysis illustrates some of the functionality offered by the `nzffdr`  
171 package.

172 Here we have presented an overview of the `nzffdr` open source software  
173 package, which streamlines the importing, tidying, and adding of other important  
174 variables to the New Zealand Freshwater Fish database in R. This workflow is likely  
175 already being undertaken by researchers across New Zealand and overseas in an *ad hoc*  
176 manner. The `nzffdr` package speeds up this process and contributes to a reproducible  
177 workflow.

## 178 **Acknowledgements**

179 The authors thank Quinn Asena, Jacqui Vanderhoorn, Craig Simpkins, Hayley Alena,  
180 George Perry, and André Bellvé for feedback on earlier versions of the code. This  
181 research was supported by use of the Nectar Research Cloud and by The University of  
182 Auckland. FL was supported by a George Mason Centre for the Natural Environment  
183 Research Fellowship.



184 **Data availability statement**

185 The release version of the nzffdr software package described here is archived on the  
186 Comprehensive R Archive Network (<https://cran.r-project.org>) and the latest  
187 development version can be installed from <https://github.com/flee598/nzffdr>. The code  
188 used to produce the tables and figure in this manuscript is available via Figshare:  
189 <https://doi.org/10.17608/k6.auckland.14776770.v1>.

190 **References**

- 191 Crow, S. (2017). New Zealand Freshwater Fish Database. Version 1.2. The National  
192 Institute of Water and Atmospheric Research (NIWA). Occurrence Dataset  
193 <https://doi.org/10.15468/ms5iqu>.
- 194 Dunn, N. R., Allibone, R. M., Closs, G., Crow, S., David, B. O., Goodman, J., Griffiths,  
195 M. H., Jack, D., Ling, N., & Waters, J. M. (2017). Conservation status of New  
196 Zealand freshwater fishes, 2017. Department of Conservation.
- 197 Goodman, JM., Dunn, N., Ravenscroft, P., Allibone, R., Boubee, J., David, B.,  
198 Griffiths, M., Ling, N., Hitchmough, R., & Rolfe, J. (2014). Conservation status  
199 of New Zealand freshwater fish, 2013.
- 200 Jellyman, P. G., & Harding, J. S. (2012). The role of dams in altering freshwater fish  
201 communities in New Zealand. *New Zealand Journal of Marine and Freshwater*  
202 *Research*, 46(4), 475–489.
- 203 Jones, P. E., & Closs, G. P. (2015). Life history influences the vulnerability of New Z  
204 ealand galaxiids to invasive salmonids. *Freshwater Biology*, 60(10), 2127–2141.
- 205 Joy, M. K., & Death, R. G. (2004). Application of the index of biotic integrity  
206 methodology to New Zealand freshwater fish communities. *Environmental*  
207 *Management*, 34(3), 415–428.

208 Lai, J., Lortie, C. J., Muenchen, R. A., Yang, J., & Ma, K. (2019). Evaluating the  
209 popularity of R in ecology. *Ecosphere*, 10(1), e02567.

210 Leathwick, J. R., Elith, J., & Hastie, T. (2006). Comparative performance of generalized  
211 additive models and multivariate adaptive regression splines for statistical  
212 modelling of species distributions. *Ecological Modelling*, 199(2), 188–196.

213 Lee, F., & Young, N. (2021). *nzffdr: Import, Clean and Update Data from the New*  
214 *Zealand Freshwater Fish Database*. <https://CRAN.R-project.org/package=nzffdr>

215 R Core Team. (2020). *R: A Language and Environment for Statistical Computing*. R  
216 Foundation for Statistical Computing. <https://www.R-project.org/>

217 Snelder, T., & Biggs, B. (2004). *New Zealand River Environment Classification User*  
218 *Guide*. Ministry for the Environment, Auckland.

219 Wickham, H. (2016). *ggplot2: Elegant Graphics for Data Analysis*. Springer-Verlag.  
220 <https://ggplot2.tidyverse.org>

221 Wickham, H., François, R., Henry, L., & Müller, K. (2021). *dplyr: A Grammar of Data*  
222 *Manipulation*. <https://CRAN.R-project.org/package=dplyr>

223

224

225

226

227

228

229

230

231

232

233

234

235 **Figures**

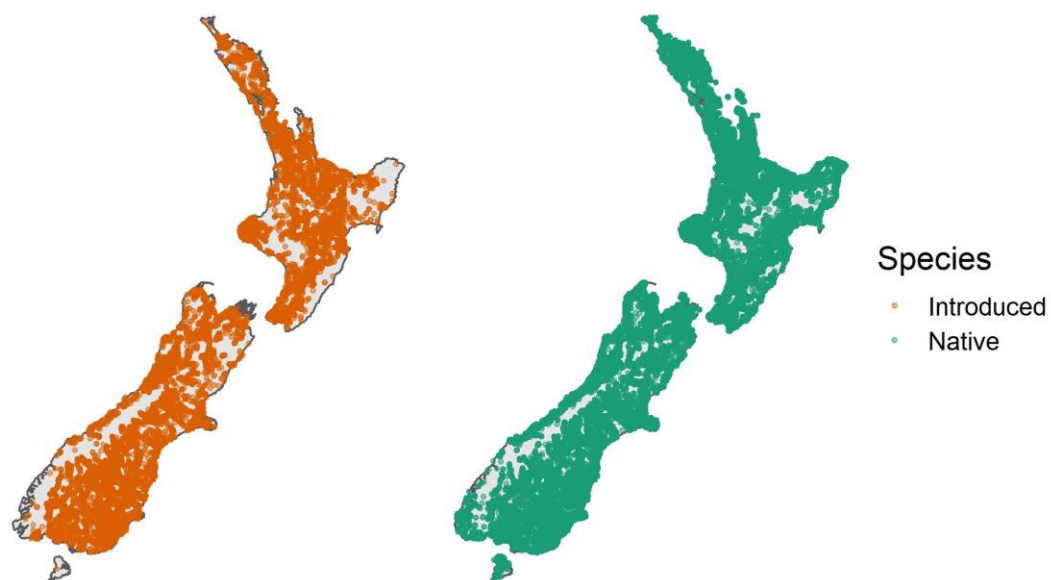

236 Figure 1. Distribution of introduced and native species records from the NZFFD, where  
237 the introduced/native variable and the map of New Zealand are provided by the nzffdr R  
238 package.

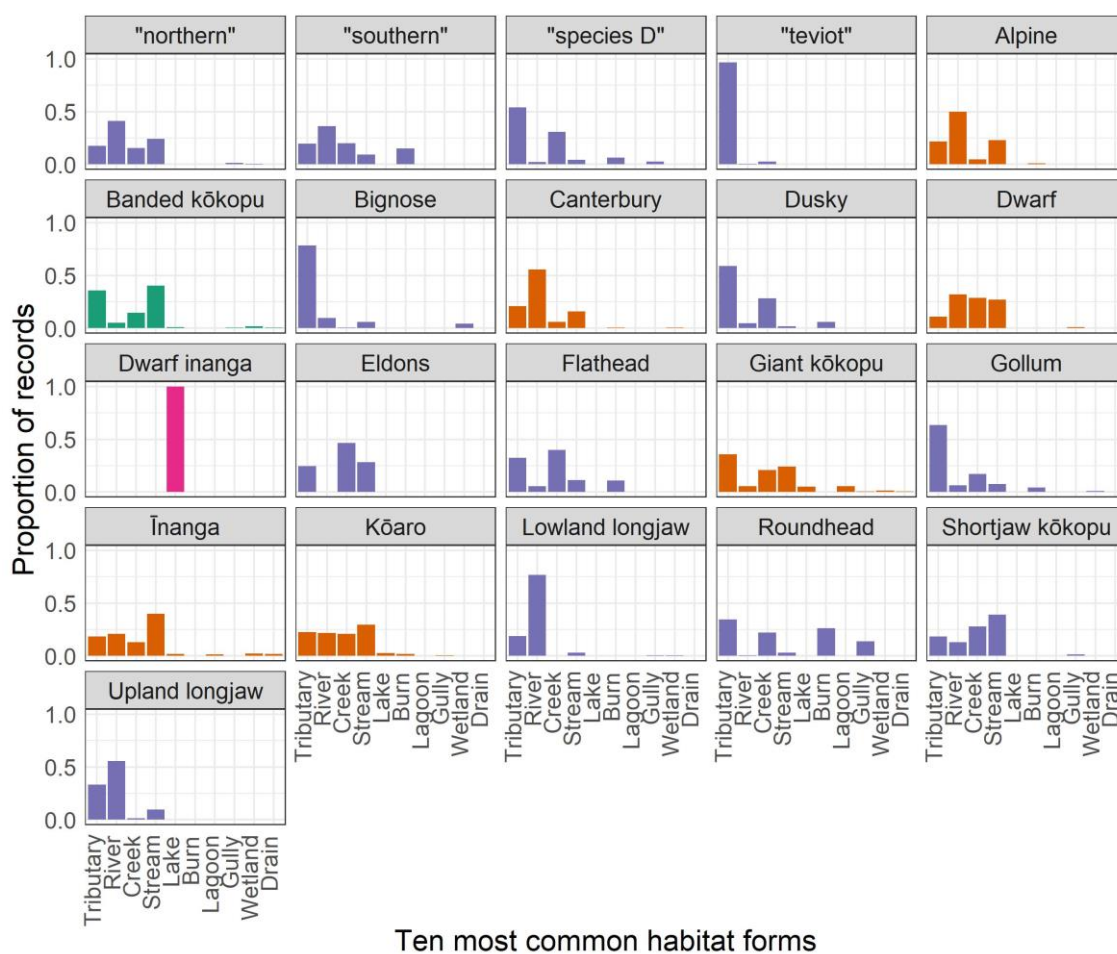

Threat status ■ not threatened ■ at risk ■ threatened ■ taxonomically indistinct

239

240 Figure 2. The relative number of records occurring across 10 habitat forms for each of  
 241 the *Galaxias* species, the total number of observations for each species is given in  
 242 parentheses. The habitat form and threat classification variables have been added to  
 243 NZFFD data via the nzffdr R package.

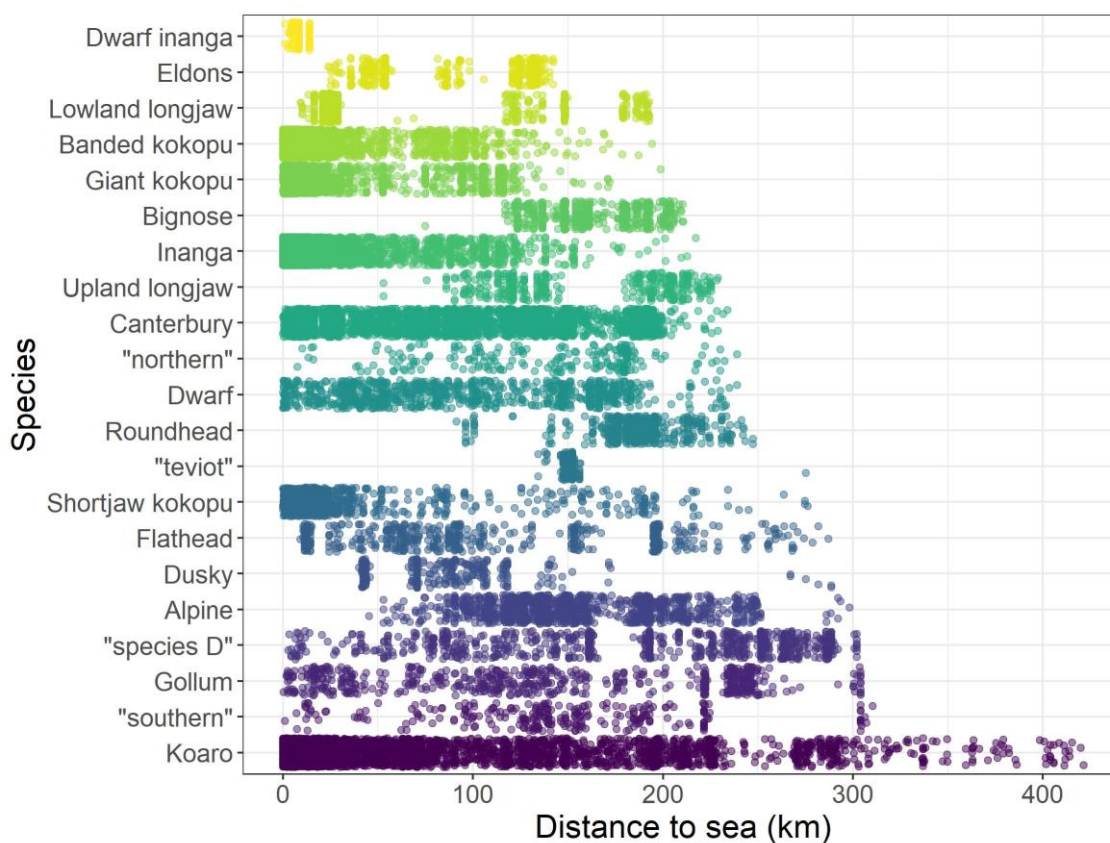

244

245 Figure 3. Distance to sea (km) that each of the *Galaxias* species in the NZFFD have

246 been observed. The distance to sea variable is added to the NZFFD data from the River

247 Environment Classification database via the *nzffdr* R package.
